# Supplementary material
Source: PubMed Central journal article supplement (PMC1553188)

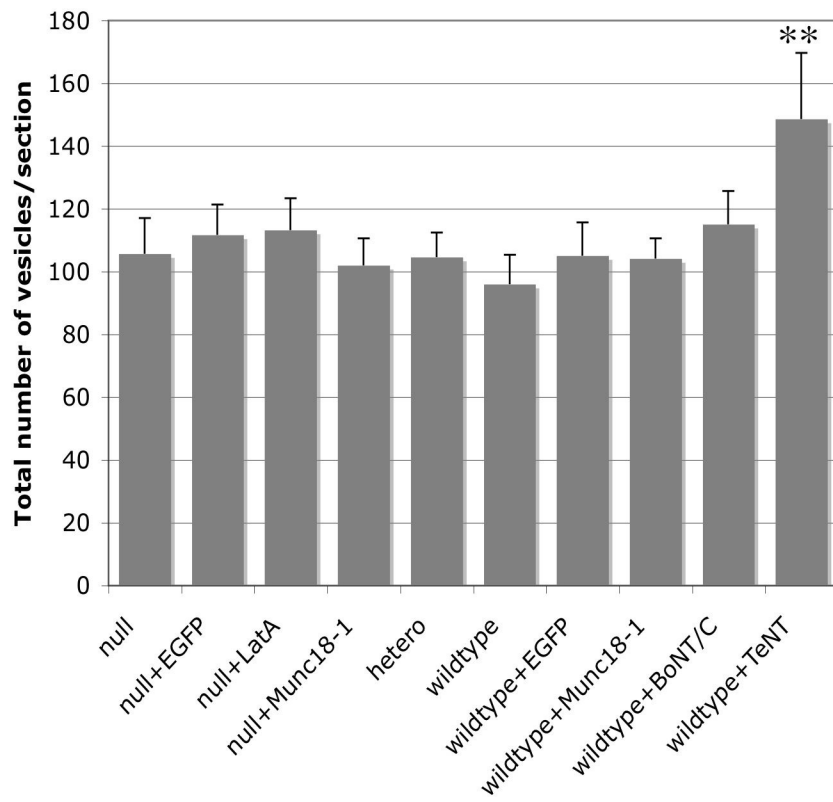

Suppl. Fig. S1 Toonen et al.

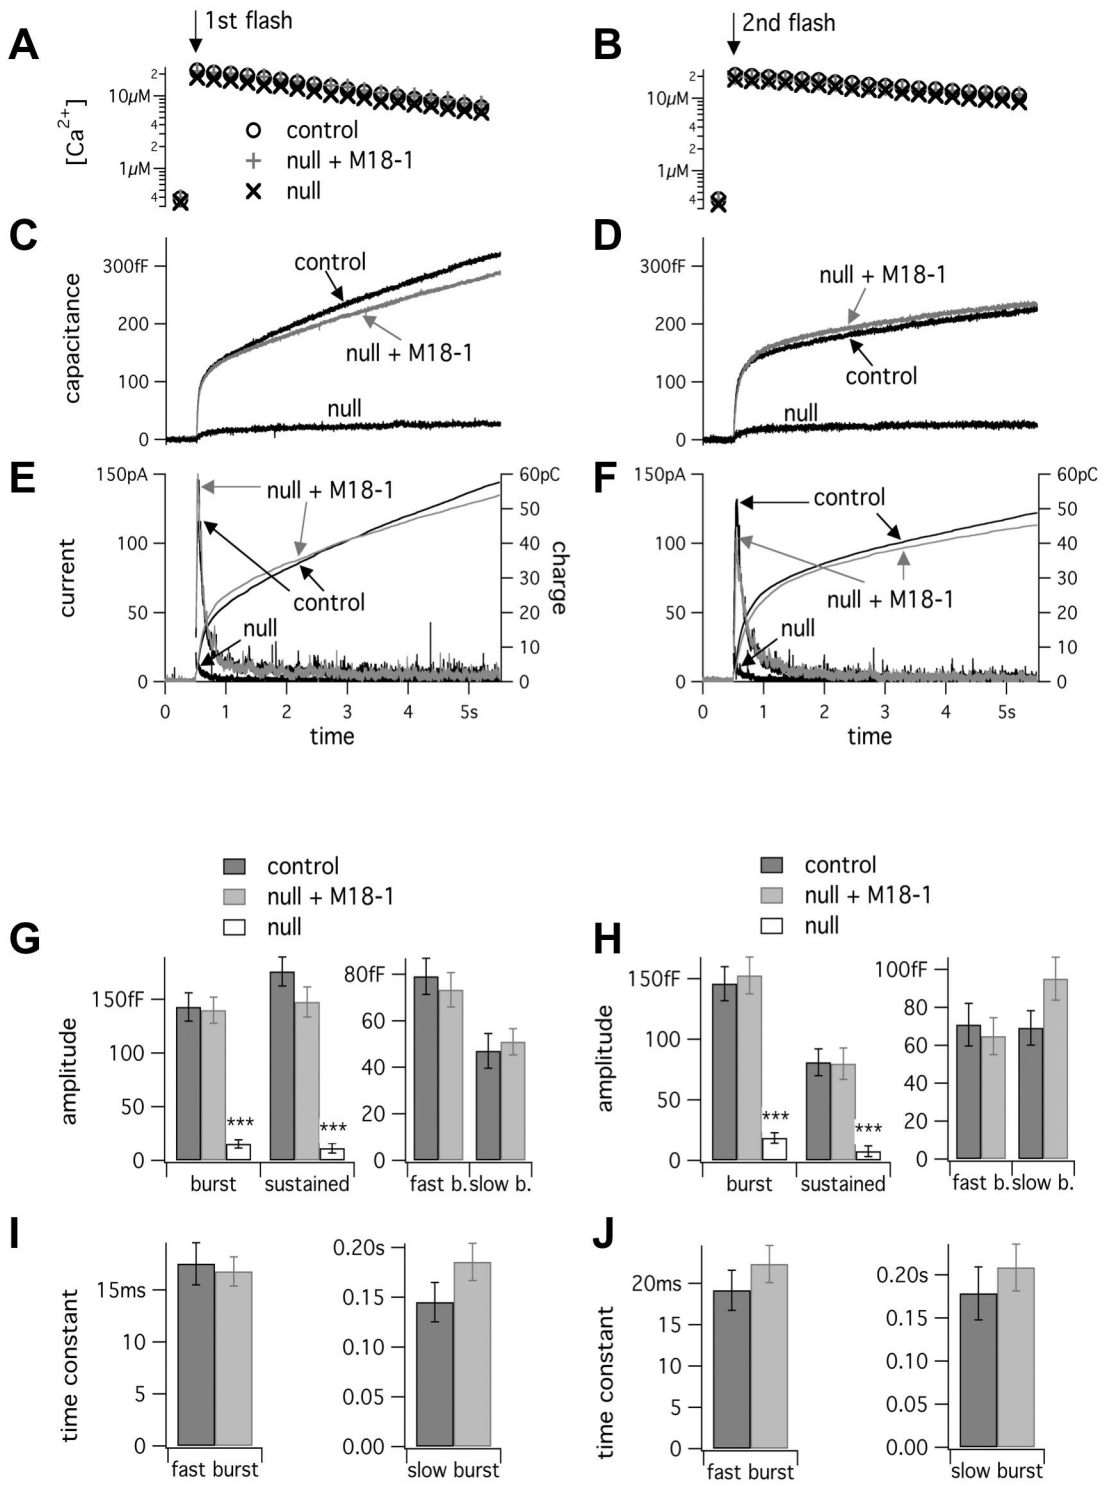

Suppl. Fig. S2 Toonen et al.

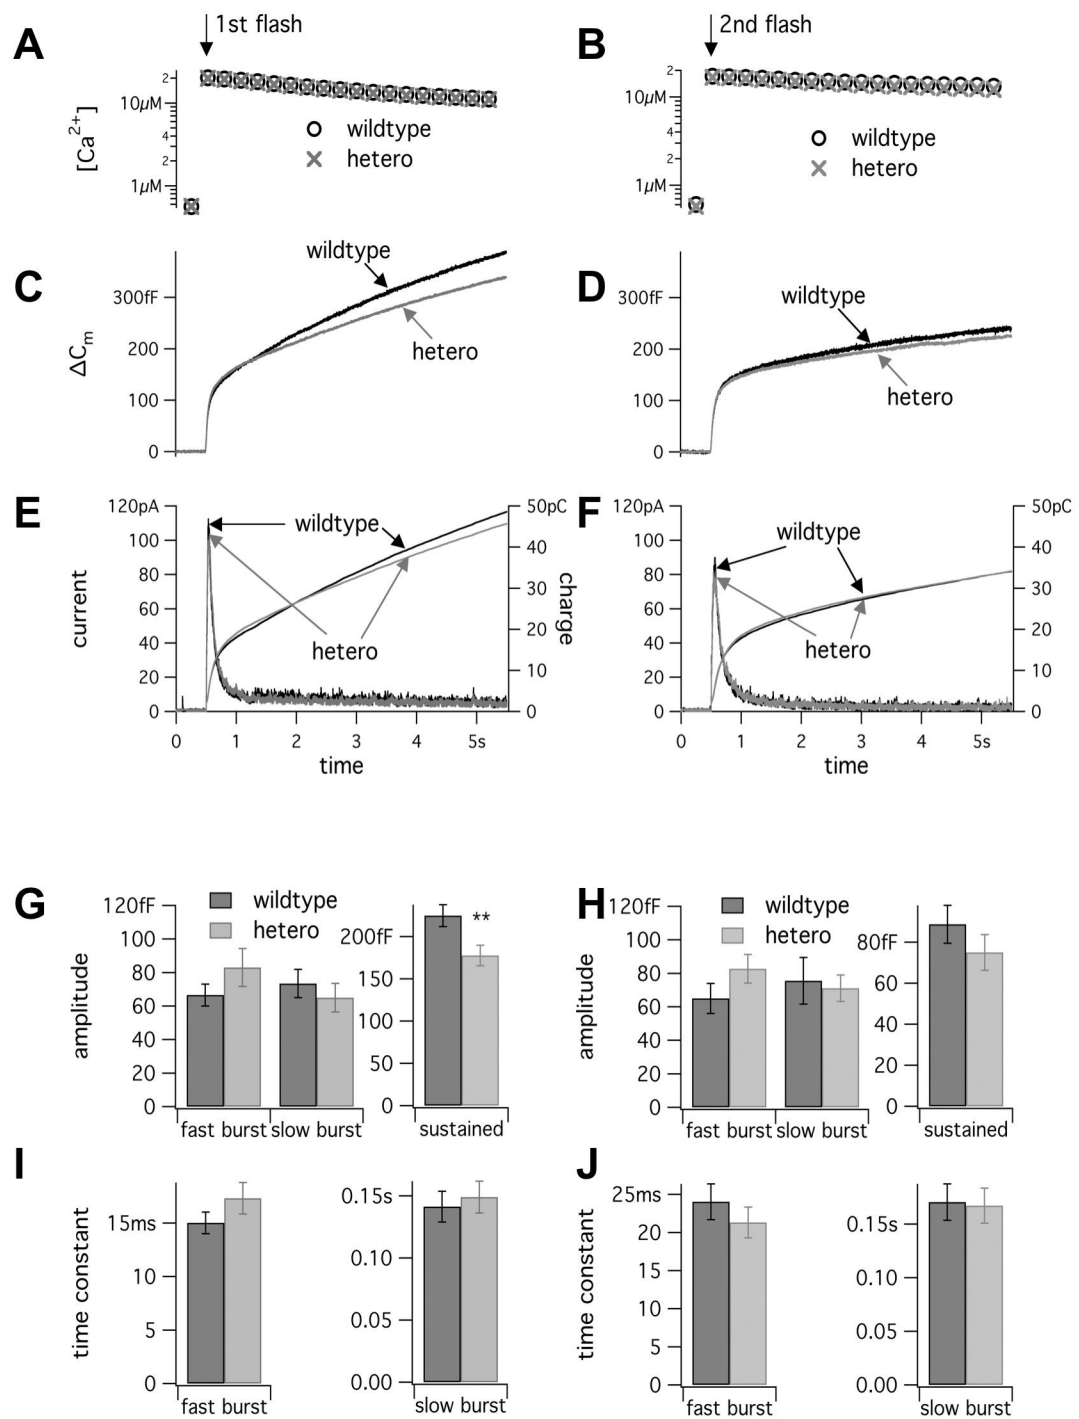

Suppl. Fig. S3 Toonen et al.

A

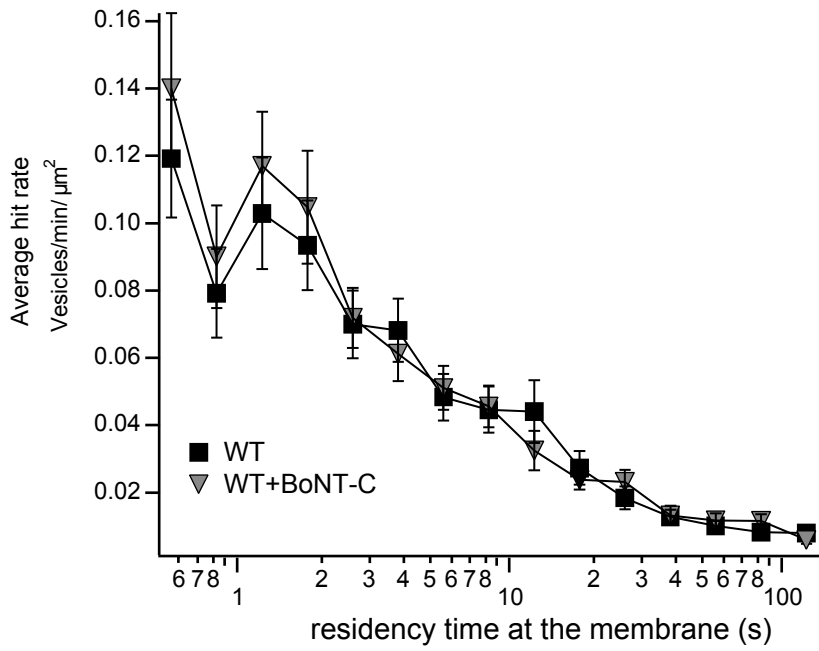

B

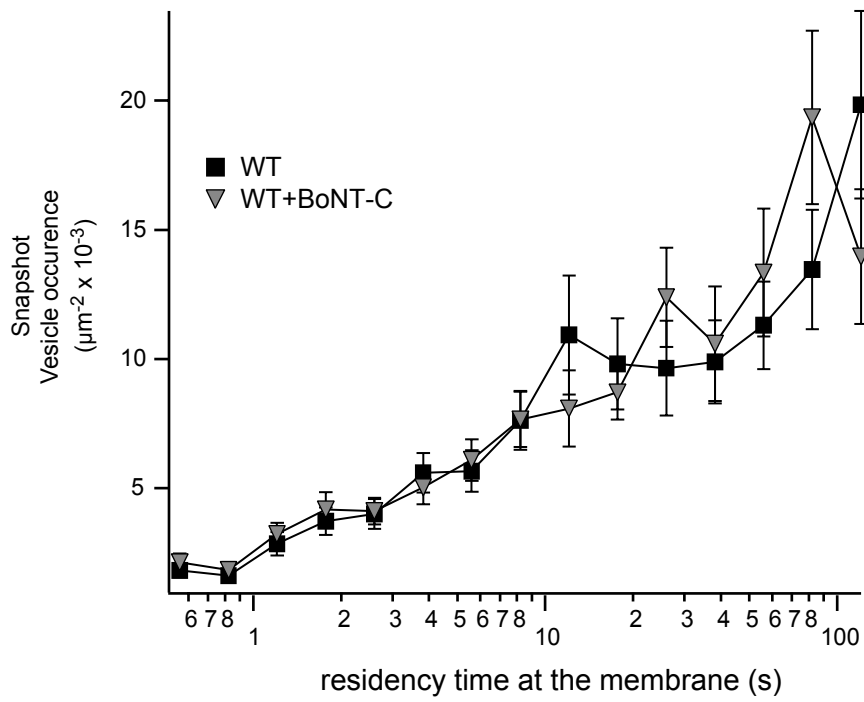

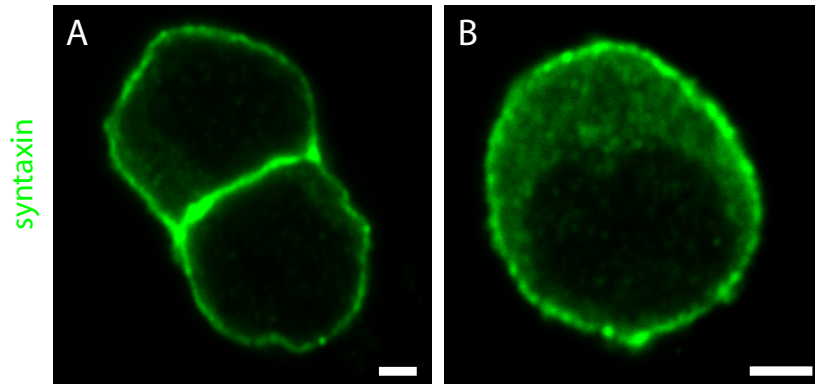

Suppl. Fig S5 Toonen et al.

Supplement: 7601256s2.pdf [file 7601256s2.pdf]
